# Supplementary material
Source: PubMed Central journal article supplement (PMC3195601)

## SUPPLEMENTARY INFORMATION

Table S1. Sequences of primers used.

Figure S1. CpG density in THE1D LTR copies. The number of CpG dinucleotides in all THE1D LTR genomic copies is represented as a histogram.

Figure S2. Correlation of DNA methylation and expression from the IL2RB LTR at each CpG site in PBMC and placenta.

Figure S3. DNA methylation of the IL2RB LTR following 5azaC treatment in JEG-3 and U87-MG cells. Filled circles are methylated sites and open circles are unmethylated.

Figure S4. DNA methylation of the IL2RB LTR of first and second trimester trophoblast (T) and mesenchyme (M) samples (two each). Filled circles are methylated sites and open circles are unmethylated.

Figure S5. Western blot on positive control cells (human IL-2RB transfected 293T) and placenta samples. A. Positive control with anti-IL2RB from Santa Cruz and anti-ACTIN. B. Positive control with anti-IL2RB from Abcam and anti-ACTIN. C. Placenta samples with anti-IL2RB from Abcam and anti-GRB2.

**Table S1 : sequence of primers****qRT-PCR**

| Primer         | Sequence                 | Region                 |
|----------------|--------------------------|------------------------|
| IL2RB-q3s      | TTCCTGGCTCCACCCTGT       | IL2RB exon 2 fwd       |
| IL2RB-q4as     | AGAAGCATGTGAACTGGGAAGT   | IL2RB exon 3 rev       |
| IL2RB-q5s      | CACCACGATTGGCTTCCTT      | LTR1 fwd               |
| IL2RB-q9s      | ATGTGGAACCGGCTTCCTT      | LTR2 fwd               |
| IL2RB-q7s      | ACCGGGGAGGACTGGAGA       | IL2RB exon 1b fwd      |
| IL2RB-q6as     | CTGCAGATGCCCAAGAGGTA     | Exon 2 rev             |
| IL2RA-q1s      | GCTGTGTTTTCTGCTGATCA     | IL2RA exon 7 fwd       |
| IL2RA-q2as     | TGGGCTTCATGACTTCTGTTGT   | IL2RA exon 8 rev       |
| IL2RG-q1s      | TACTGAATACCACGGAACTTTT   | IL2RG exon 7 fwd       |
| IL2RG-q2as     | AGGCAGAGTCGTTCACTGTAGTCT | IL2RG exon 8 rev       |
| IL15RA-q7s     | CAGCCGCCAGGTGTGTAT       | IL15RA exon 4/5        |
| IL15RA-q8as    | GGAGTTTGCCTTGACTTGAGGTA  | IL15RA exon 6/7        |
| IL2RB SD1-AdSA | CACCACGATTGGTTTCCTTG     | Splice vector LTR1 fwd |
| IL2RB SD2-AdSA | ATGTGGAACCGGTTTCCTTG     | Splice vector LTR2 fwd |
| Luc-1as        | CCGTCTTCGAGTGGGTAGAAT    | Luciferase rev         |

**Bisulphite sequencing**

| Primer           | Sequence                       | Equivalent unconverted         | Region                |
|------------------|--------------------------------|--------------------------------|-----------------------|
| IL2RB-LTR-BS-1s  | GGATTTAGAATAGAAATTTTATGGTT     | GGACCCAGAACAGAAATCTCATGGCC     | LTR fwd               |
| IL2RB-LTR-BS-2as | AACACAACAATTTACCCTTAAA         | AGGCACAACAGATTTGCCCTTAGG       | LTR rev               |
| IL2RB-LTR-BS-3s  | TGAGATTGTTATTTTGTGGTTT         | TGAGACTGCCATCCTGTGGCCC         | Nested fwd            |
| IL2RB-LTR-BS-4as | CCCTTAAACCAATAATATATAATCTAA    | CCCTTAGGCCAATGATGTATGATCTGG    | Nested rev            |
| IL2RB-LTR-BS-7s  | GTATGTGTTTTATGAAATGTTATGAAT    | GTATGTGTCCTATGAAATGCCATGAAC    | Downstream fwd        |
| IL2RB-LTR-BS-8as | CTCTCCTACCAACATATAAAAATACC     | CTCTCCTGCCAGCATGTGAAGGTGCC     | Downstream rev        |
| IL2RB-LTR-BS-5s  | GTTATGAATTTTAATTATGTTTGTATAGAA | GCCATGAACCCCAACTATGCTTGTACAGAA | Downstream nested fwd |
| IL2RB-LTR-BS-6as | AACCTCCCCAACCATATAAA           | AGGCCTCCCCAGCCATGTGGA          | Downstream nested rev |

Figure S1

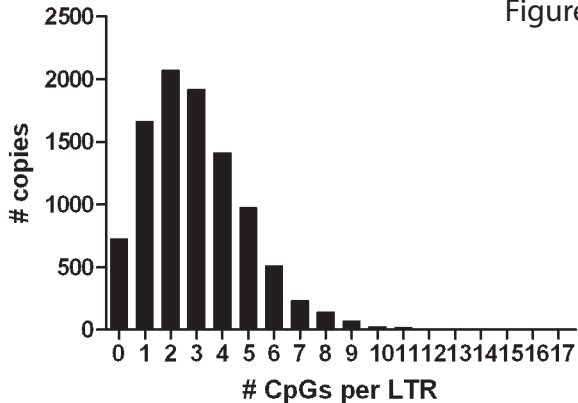

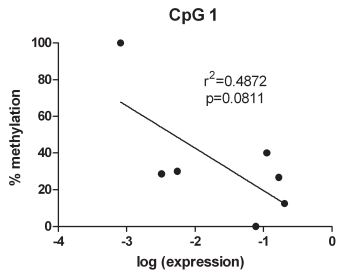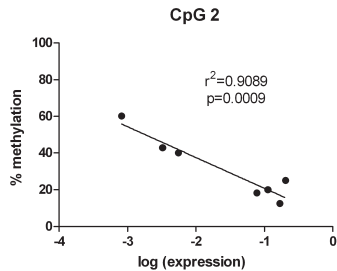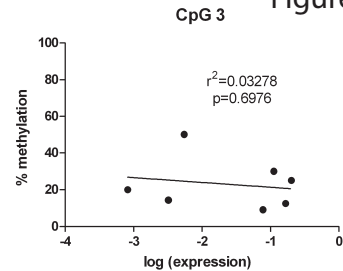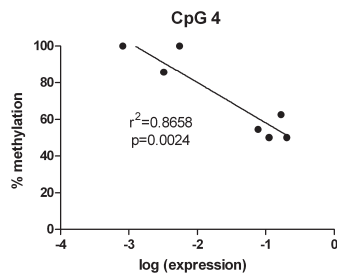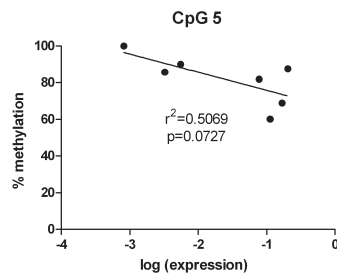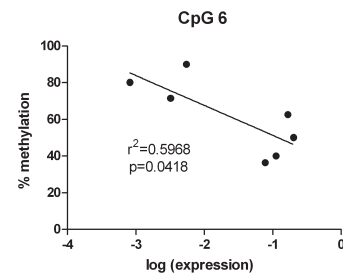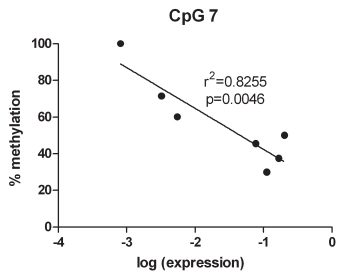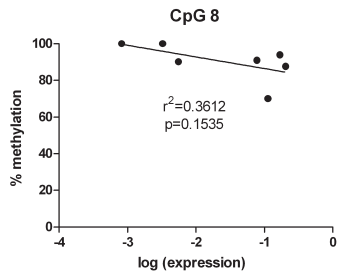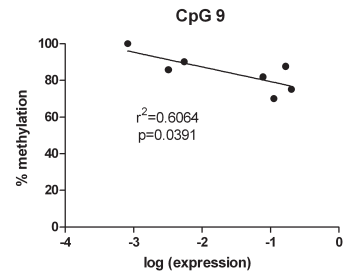

Figure S3

Untreated

5-azacytidine

JEG-3

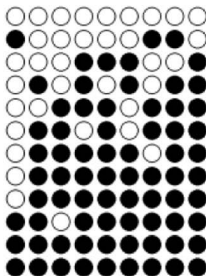

67.6 %

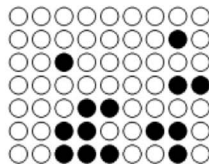

22.2 %

U87-MG

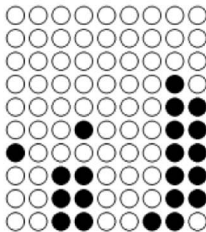

23.3%

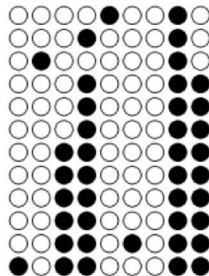

38.0%

First trimester

Second trimester

T

M

T

M

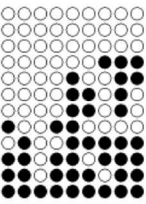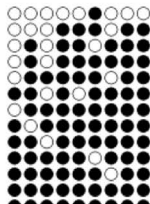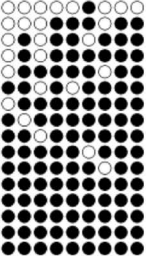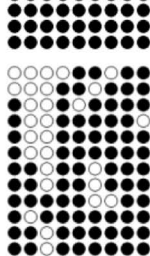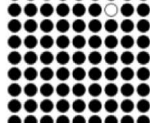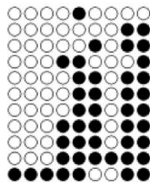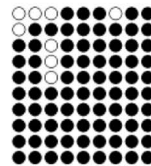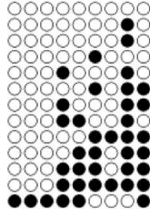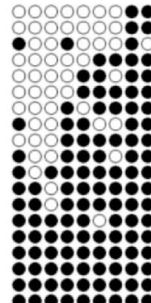

64.8 %

83.3 %

38.4 %

77.4 %

\*\*\*

Figure S4

\*\*\*

# Figure S5

## A

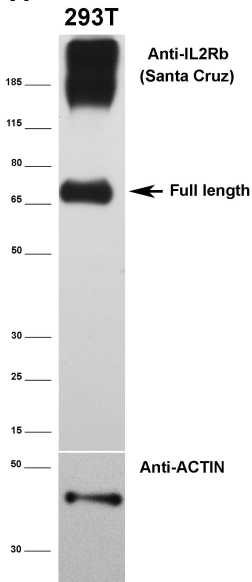

## B

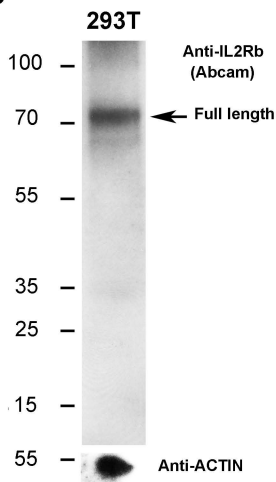

## C

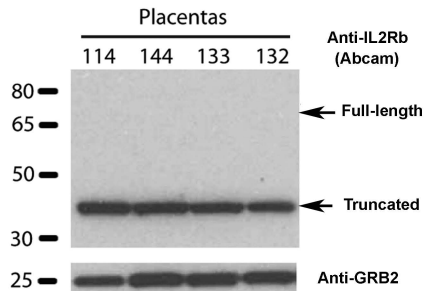

Supplement: supp_M111.227637_jbc.M111.227637-1.pdf [file supp_M111.227637_jbc.M111.227637-1.pdf]
